# Supplementary material for: Prolonged exposure to lung-derived cytokines is associated with inflammatory activation of microglia in patients with COVID-19
Source: PubMed Central journal article supplement — bioRxiv. 2023 Jul 28:2023.07.28.550765. Preprint. [Version 1] doi: 10.1101/2023.07.28.550765 (PMC10402123; doi:10.1101/2023.07.28.550765), 2023-07-28
Supplement: NIHPP2023.07.28.550765v1-supplement-5.pdf [file NIHPP2023.07.28.550765v1-supplement-5.pdf]

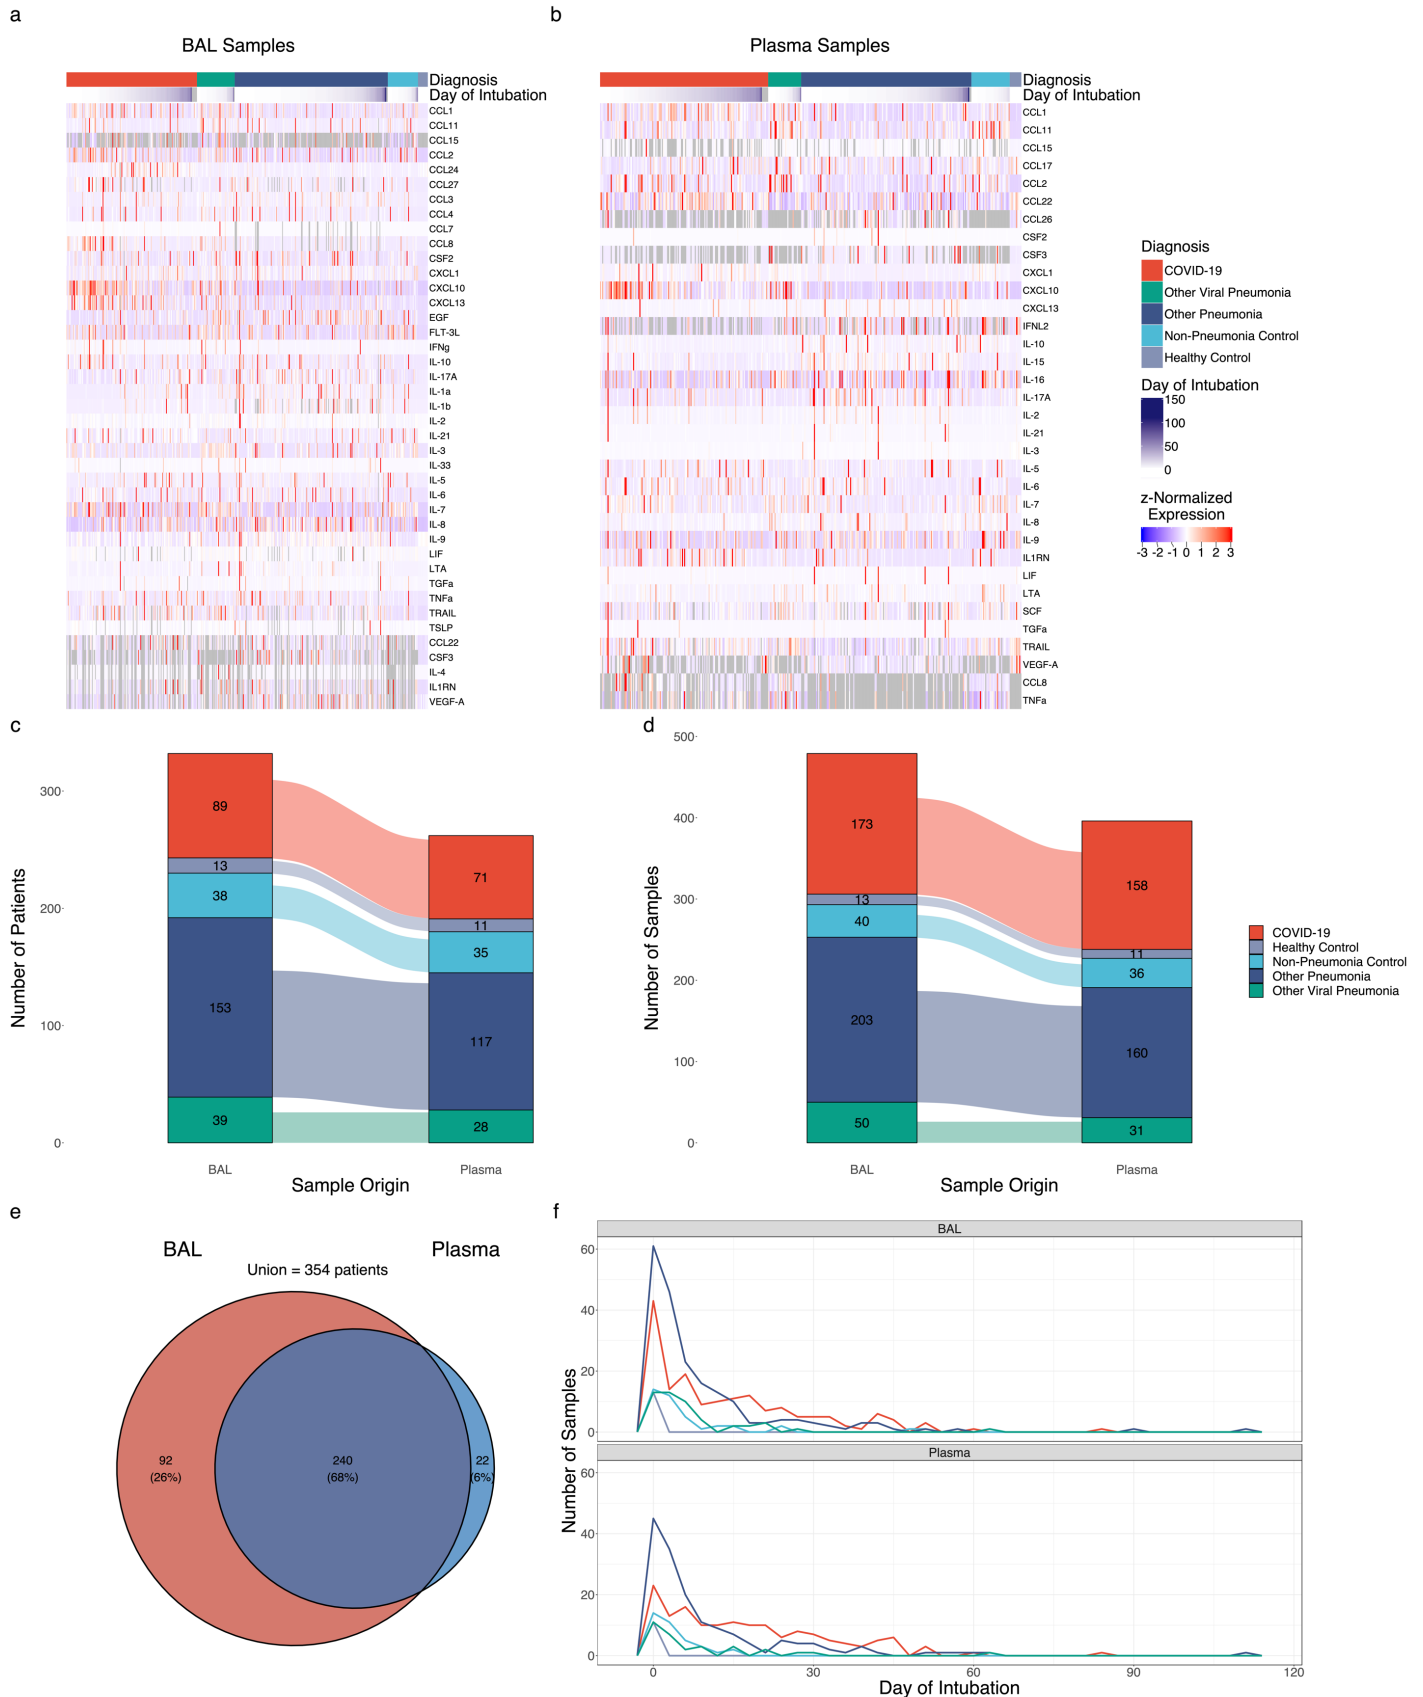

**Figure S2.** Related to figure 2. **(a)** Heatmap of 41 cytokines showing significant variability by diagnosis ( $q < 0.05$ , Kruskal–Wallis) from 479 BAL samples collected throughout the entire ICU stay from 332 patients. **(b)**

Heatmap of 31 cytokines showing significant variability by diagnosis ( $q < 0.05$ , Kruskal–Wallis) from 396 plasma samples collected throughout the entire ICU stay from 262 patients. **(c,d)** Alluvial plot of total numbers of patients included in the BAL fluid (c) and plasma (d) datasets. **(e)** Venn diagram of patients with BAL and plasma samples. **(f)** Frequency polygon plot of BAL and plasma sampling distributions throughout patient stay by group.

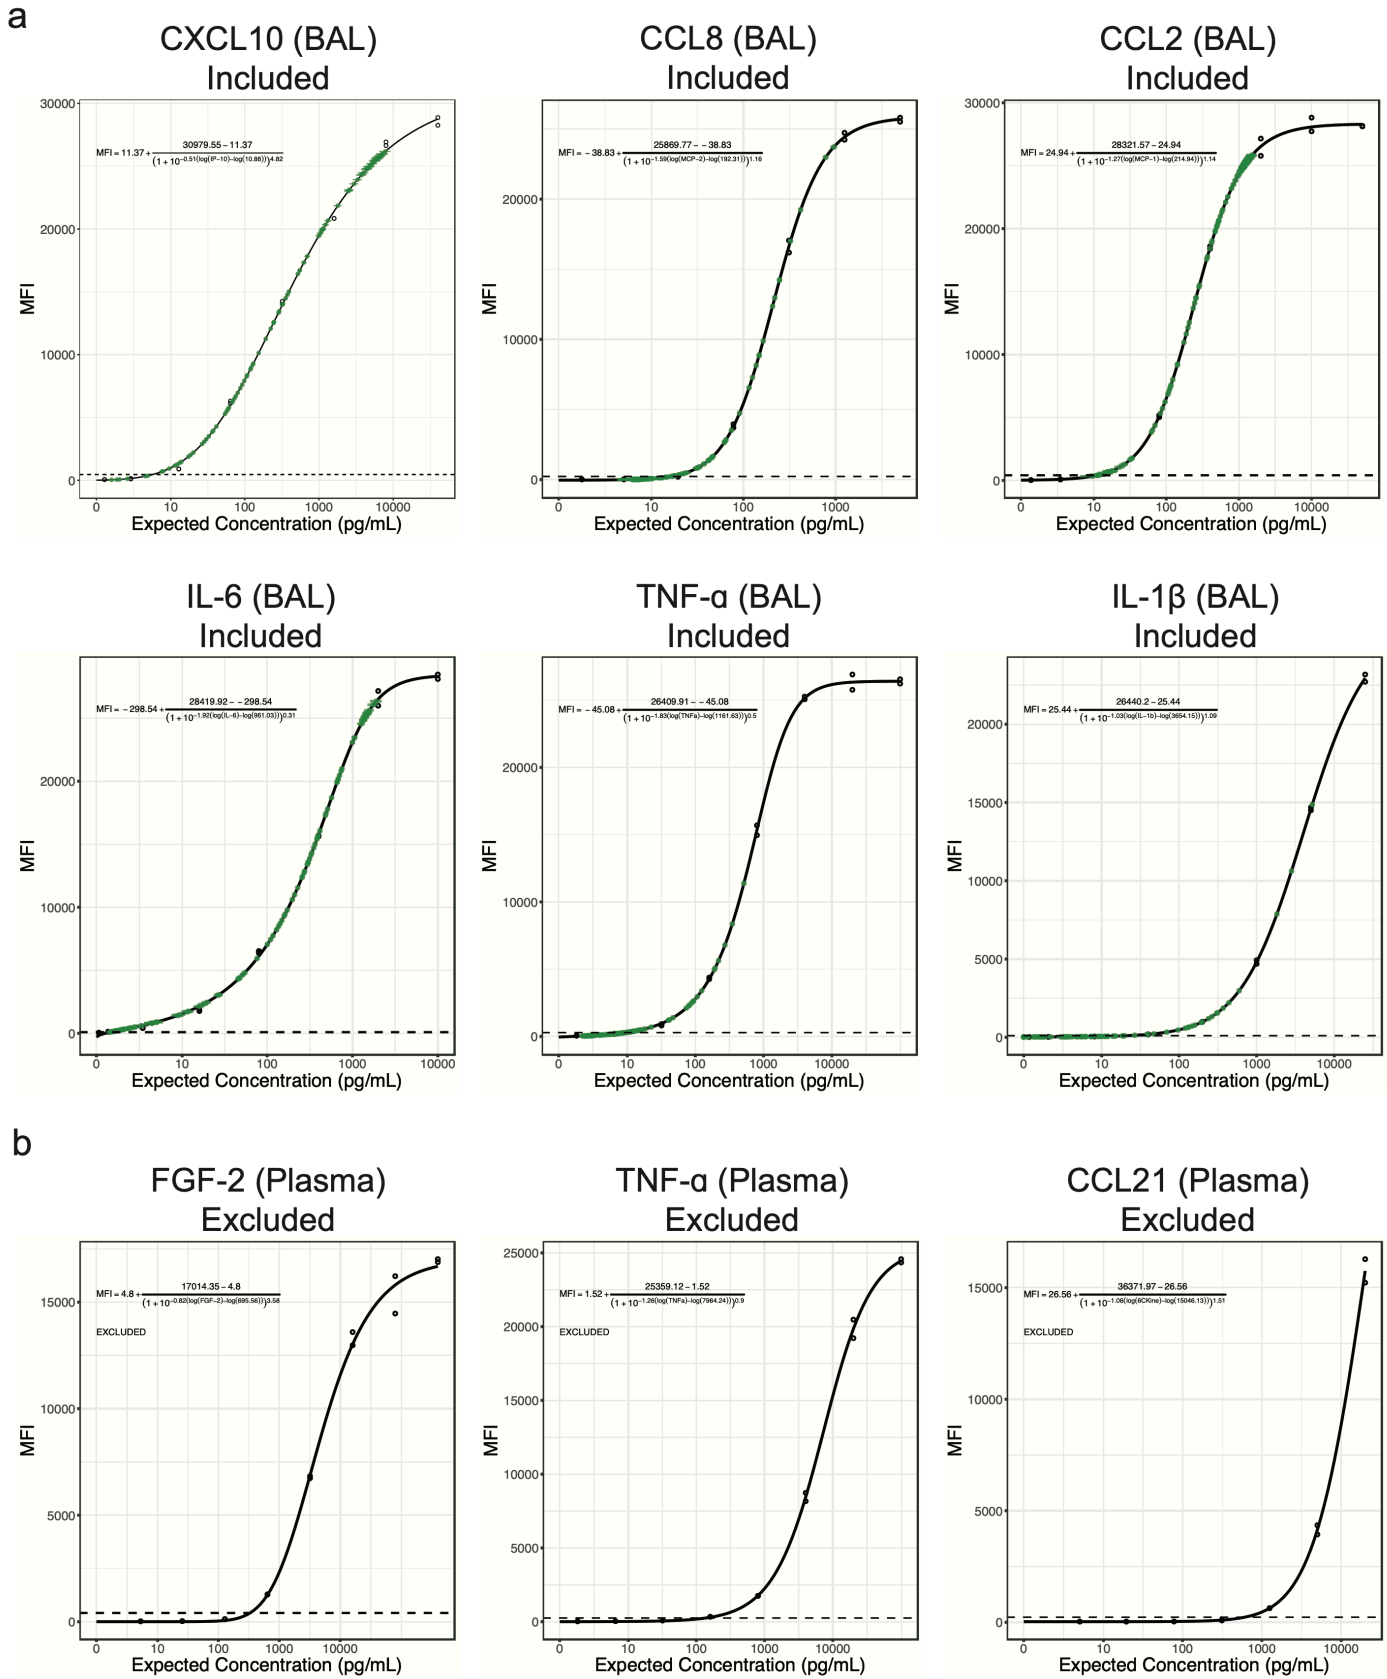

**Figure S3. Representative standard curve fitting plots for cytokine data exclusion. (a)** Representative standard curves and fitted cytokine expression values for analytes included in this study. From left to right, top to bottom: CXCL10 (IP-10), CCL8 (MCP-2), CCL2 (MCP-1) IL-6, TNF-α, IL-1b. **(b)** Representative standard

curves for analytes excluded for poor sensitivity in this study. From left to right: FGF-2, TNF- $\alpha$ , and CCL21. For all plots, empty points represent standards of known concentration used for curve-fitting. Black curves and associated formulae represent the function fitted to these points. Green points represent experimental values, and green whiskers are the standard error of prediction. Dotted lines are the upper limit of the 95% confidence interval of lower asymptote prediction.

**Supplemental Data File 1.** Pseudobulk DESeq2 differential expression analysis results from human microglia scRNA-seq in COVID-19 vs. controls.

**Supplemental Data File 2.** Complete pairwise comparisons between diagnosis groups for all relevant cytokine cohort metadata (see Table 2).

**Supplemental Data File 3.** Complete comparisons between patients with early BALs and the entire cohort for all relevant cytokine cohort metadata.

**Supplemental Data File 4.** List of the complete NU SCRIPT investigators.

|                                      | COVID-19 (N = 5)  | Control (N = 3)   | Total (N = 8)     |
|--------------------------------------|-------------------|-------------------|-------------------|
| <b>Age (years)</b>                   |                   |                   |                   |
| Minimum                              | 35                | 44                | 35                |
| Median (IQR)                         | 61.0 (61.0, 72.0) | 51.0 (47.5, 63.5) | 61.0 (49.2, 73.0) |
| Mean (SD)                            | 61.4 ± 16.5       | 57.0 ± 16.8       | 59.8 ± 15.5       |
| Maximum                              | 78                | 76                | 78                |
| <b>Sex</b>                           |                   |                   |                   |
| Female                               | 0 (0.0%)          | 1 (33.3%)         | 1 (12.5%)         |
| Male                                 | 5 (100.0%)        | 2 (66.7%)         | 7 (87.5%)         |
| <b>Race</b>                          |                   |                   |                   |
| Asian                                | 1 (20.0%)         | 0 (0.0%)          | 1 (12.5%)         |
| Black or African-American            | 1 (20.0%)         | 1 (33.3%)         | 2 (25.0%)         |
| Other                                | 0 (0.0%)          | 1 (33.3%)         | 1 (12.5%)         |
| White                                | 3 (60.0%)         | 1 (33.3%)         | 4 (50.0%)         |
| <b>Ethnicity</b>                     |                   |                   |                   |
| Hispanic or Latino                   | 1 (20.0%)         | 0 (0.0%)          | 1 (12.5%)         |
| Not Hispanic or Latino               | 4 (80.0%)         | 3 (100.0%)        | 7 (87.5%)         |
| <b>SOFA</b>                          |                   |                   |                   |
| Minimum                              | 12                | 10                | 10                |
| Median (IQR)                         | 15.0 (13.5, 16.5) | 14.5 (12.2, 16.8) | 15.0 (12.5, 17.5) |
| Mean (SD)                            | 15.0 ± 2.6        | 14.5 ± 6.4        | 14.8 ± 3.5        |
| Maximum                              | 18                | 19                | 19                |
| Deceased                             | 1 (20.0%)         | 1 (33.3%)         | 2 (25.0%)         |
| <b>Duration of Intubation (days)</b> |                   |                   |                   |
| Minimum                              | 5 (100.0%)        | 3 (100.0%)        | 8 (100.0%)        |
| Median (IQR)                         | 0.8               | 0.9               | 0.8               |
| Mean (SD)                            | 7.0 (1.2, 18.0)   | 1.7 (1.3, 8.8)    | 4.3 (1.1, 16.5)   |
| Maximum                              | 9.3 ± 9.0         | 6.2 ± 8.5         | 8.1 ± 8.3         |
| <b>Length of ICU Stay (days)</b>     |                   |                   |                   |
| Minimum                              | 19.4              | 16                | 19.4              |
| Median (IQR)                         | 0.8               | 0                 | 0                 |
| Mean (SD)                            | 7.9 (1.2, 15.4)   | 1.7 (0.8, 8.8)    | 4.8 (1.1, 15.6)   |
| Maximum                              | 8.3 ± 7.4         | 5.9 ± 8.8         | 7.4 ± 7.4         |
| <b>BMI (kg/m<sup>2</sup>)</b>        |                   |                   |                   |
| Minimum                              | 16                | 16                | 16                |
| Median (IQR)                         | 23.8              | 20.7              | 20.7              |
| Mean (SD)                            | 26.4 (24.6, 29.4) | 21.3 (21.0, 28.1) | 24.9 (22.6, 30.8) |
| Maximum                              | 27.6 ± 4.4        | 25.7 ± 8.1        | 26.8 ± 5.7        |
| Unknown/Missing                      | 33.6470588235294  | 35                | 35                |
| <b>Smoking Status</b>                |                   |                   |                   |
| Current Smoker                       | 1 (20.0%)         | 0 (0.0%)          | 1 (12.5%)         |
| Never Smoker                         | 4 (80.0%)         | 2 (66.7%)         | 6 (75.0%)         |
| Past Smoker                          | 0 (0.0%)          | 1 (33.3%)         | 1 (12.5%)         |
| <b>Postmortem Interval (hours)</b>   |                   |                   |                   |
| Minimum                              | 15.2              | 16.7              | 15.2              |
| Median (IQR)                         | 38.4 (18.9, 45.5) | 24.3 (20.5, 36.4) | 31.4 (18.3, 46.2) |
| Mean (SD)                            | 35.1 ± 17.9       | 29.8 ± 16.6       | 33.1 ± 16.4       |
| Maximum                              | 57.5              | 48.5              | 57.5              |
| <b>Immunosuppressed</b>              |                   |                   |                   |
| Immunosuppressed                     | 2 (40.0%)         | 0 (0.0%)          | 2 (25.0%)         |
| Not Immunosuppressed                 | 3 (60.0%)         | 3 (100.0%)        | 6 (75.0%)         |
| <b>Cancer</b>                        |                   |                   |                   |
| Diagnosed                            | 0 (0.0%)          | 1 (33.3%)         | 1 (12.5%)         |
| Not Diagnosed                        | 5 (100.0%)        | 2 (66.7%)         | 7 (87.5%)         |
| <b>Cardiac Arrest</b>                |                   |                   |                   |
| Cardiac Arrest with ROSC             | 2 (40.0%)         | 2 (66.7%)         | 4 (50.0%)         |
| No Cardiac Arrest with ROSC          | 3 (60.0%)         | 1 (33.3%)         | 4 (50.0%)         |
| <b>Cognitive Impairment</b>          |                   |                   |                   |
| Diagnosed                            | 1 (20.0%)         | 1 (33.3%)         | 2 (25.0%)         |
| Not Diagnosed                        | 4 (80.0%)         | 2 (66.7%)         | 6 (75.0%)         |
| <b>Diabetes</b>                      |                   |                   |                   |
| Diagnosed                            | 1 (20.0%)         | 0 (0.0%)          | 1 (12.5%)         |
| Not Diagnosed                        | 4 (80.0%)         | 3 (100.0%)        | 7 (87.5%)         |
| <b>Renal Disease</b>                 |                   |                   |                   |
| Diagnosed                            | 3 (60.0%)         | 1 (33.3%)         | 4 (50.0%)         |
| Not Diagnosed                        | 2 (40.0%)         | 2 (66.7%)         | 4 (50.0%)         |
| <b>Substance Use Disorder</b>        |                   |                   |                   |
| Not Diagnosed                        | 5 (100.0%)        | 3 (100.0%)        | 8 (100.0%)        |
| <b>Venous Thromboembolism</b>        |                   |                   |                   |
| Diagnosed                            | 0 (0.0%)          | 1 (33.3%)         | 1 (12.5%)         |

bioRxiv preprint doi: <https://doi.org/10.1101/2023.07.28.550765>; this version posted July 28, 2023. The copyright holder for this preprint (which was not certified by peer review) is the author/funder, who has granted bioRxiv a license to display the preprint in perpetuity. It is made available under aCC-BY-NC-ND 4.0 International license.

**Table S1.** Demographics of the postmortem brain scRNA-seq cohort. Frontal lobe samples were collected in the course of autopsy at Northwestern Memorial Hospital.

|                            | COVID-19 (N = 5)           | Control (N = 3)            | Total (N = 8)              |
|----------------------------|----------------------------|----------------------------|----------------------------|
| Not Diagnosed              | 5 (100.0%)                 | 2 (66.7%)                  | 7 (87.5%)                  |
| <b>Convalescent Plasma</b> |                            |                            |                            |
| Received Treatment         | 1 (20.0%)                  | 0 (0.0%)                   | 1 (12.5%)                  |
| Did Not Receive Treatment  | 4 (80.0%)                  | 3 (100.0%)                 | 7 (87.5%)                  |
| <b>Dexamethasone</b>       |                            |                            |                            |
| Received Treatment         | 2 (40.0%)                  | 0 (0.0%)                   | 2 (25.0%)                  |
| Did Not Receive Treatment  | 3 (60.0%)                  | 3 (100.0%)                 | 6 (75.0%)                  |
| <b>IL-6 Blockers</b>       |                            |                            |                            |
| Received Treatment         | 1 (20.0%)                  | 0 (0.0%)                   | 1 (12.5%)                  |
| Did Not Receive Treatment  | 4 (80.0%)                  | 3 (100.0%)                 | 7 (87.5%)                  |
| <b>Remdesivir</b>          |                            |                            |                            |
| Received Treatment         | 1 (20.0%)                  | 0 (0.0%)                   | 1 (12.5%)                  |
| Did Not Receive Treatment  | 4 (80.0%)                  | 3 (100.0%)                 | 7 (87.5%)                  |
| <b>CRP (mg/L)</b>          |                            |                            |                            |
| Minimum                    | 137.3                      | Inf                        | 137.3                      |
| Median (IQR)               | 283.6 (210.5, 356.8)       | NA (NA, NA)                | 283.6 (210.5, 356.8)       |
| Mean (SD)                  | 283.6 ± 207.0              | NaN ± NA                   | 283.6 ± 207.0              |
| Maximum                    | 430                        | -Inf                       | 430                        |
| Unknown/Missing            | 3 (60.0%)                  | 3 (100.0%)                 | 6 (75.0%)                  |
| <b>D-Dimer (ng/mL)</b>     |                            |                            |                            |
| Minimum                    | 1135                       | 6226                       | 1135                       |
| Median (IQR)               | 3,078.5 (2,106.8, 4,050.2) | 6,226.0 (6,226.0, 6,226.0) | 5,022.0 (3,078.5, 5,624.0) |
| Mean (SD)                  | 3,078.5 ± 2,748.5          | 6,226.0 ± NA               | 4,127.7 ± 2,660.7          |
| Maximum                    | 5022                       | 6226                       | 6226                       |
| Unknown/Missing            | 3 (60.0%)                  | 2 (66.7%)                  | 5 (62.5%)                  |

|                                      | COVID-19 (N = 93) | Healthy Control (N = 13) | Non-Pneumonia Control (N = 45) | Other Pneumonia (N = 162) | Other Viral Pneumonia (N = 41) | Total (N = 354)   |
|--------------------------------------|-------------------|--------------------------|--------------------------------|---------------------------|--------------------------------|-------------------|
| <b>Age (years)</b>                   |                   |                          |                                |                           |                                |                   |
| Minimum                              | 21                | 21                       | 19                             | 22                        | 34                             | 19                |
| Median (IQR)                         | 59.0 (46.0, 68.2) | 25.0 (23.0, 33.0)        | 59.0 (49.0, 72.0)              | 66.0 (51.2, 73.0)         | 59.0 (52.0, 69.0)              | 62.0 (48.0, 72.0) |
| Mean (SD)                            | 57.1 ± 14.3       | 27.8 ± 6.7               | 59.2 ± 17.6                    | 61.8 ± 16.3               | 60.3 ± 13.1                    | 58.9 ± 16.6       |
| Maximum                              | 86                | 40                       | 90                             | 99                        | 88                             | 99                |
| Unknown/Missing                      | 5 (5.4%)          | 0 (0.0%)                 | 0 (0.0%)                       | 0 (0.0%)                  | 0 (0.0%)                       | 5 (1.4%)          |
| <b>Sex</b>                           |                   |                          |                                |                           |                                |                   |
| Female                               | 31 (33.3%)        | 7 (53.8%)                | 20 (44.4%)                     | 63 (38.9%)                | 18 (43.9%)                     | 139 (39.3%)       |
| Male                                 | 60 (64.5%)        | 6 (46.2%)                | 25 (55.6%)                     | 99 (61.1%)                | 23 (56.1%)                     | 213 (60.2%)       |
| Unknown or Not Reported              | 2 (2.2%)          | 0 (0.0%)                 | 0 (0.0%)                       | 0 (0.0%)                  | 0 (0.0%)                       | 2 (0.6%)          |
| <b>Race</b>                          |                   |                          |                                |                           |                                |                   |
| White                                | 36 (38.7%)        | 8 (61.5%)                | 28 (62.2%)                     | 109 (67.3%)               | 26 (63.4%)                     | 207 (58.5%)       |
| Black/African American               | 19 (20.4%)        | 1 (7.7%)                 | 8 (17.8%)                      | 34 (21.0%)                | 8 (19.5%)                      | 70 (19.8%)        |
| Unknown or Not Reported              | 37 (39.8%)        | 0 (0.0%)                 | 6 (13.3%)                      | 13 (8.0%)                 | 5 (12.2%)                      | 61 (17.2%)        |
| Asian                                | <=5               | <=5                      | <=5                            | <=5                       | <=5                            | 14 (4.0%)         |
| American Indian/Alaska Native        | <=5               | <=5                      | <=5                            | <=5                       | <=5                            | <=5               |
| <b>Ethnicity</b>                     |                   |                          |                                |                           |                                |                   |
| Hispanic or Latino                   | 40 (43.0%)        | 2 (15.4%)                | 7 (15.6%)                      | 13 (8.0%)                 | 8 (19.5%)                      | 70 (19.8%)        |
| Not Hispanic or Latino               | 39 (41.9%)        | 11 (84.6%)               | 35 (77.8%)                     | 137 (84.6%)               | 30 (73.2%)                     | 252 (71.2%)       |
| Unknown or Not Reported              | 14 (15.1%)        | 0 (0.0%)                 | 3 (6.7%)                       | 12 (7.4%)                 | 3 (7.3%)                       | 32 (9.0%)         |
| <b>SOFA</b>                          |                   |                          |                                |                           |                                |                   |
| Minimum                              | 3                 | Inf                      | 3                              | 4                         | 2                              | 2                 |
| Median (IQR)                         | 10.8 (8.2, 13.2)  | NA (NA, NA)              | 10.8 (8.2, 13.2)               | 11.0 (9.0, 13.9)          | 9.5 (8.2, 12.5)                | 10.1 (8.1, 13.0)  |
| Mean (SD)                            | 9.7 ± 2.8         | NA ± NA                  | 10.8 ± 3.6                     | 11.4 ± 3.6                | 10.2 ± 3.0                     | 10.7 ± 3.4        |
| Maximum                              | 18.5              | -Inf                     | 20.3                           | 21.2                      | 15.3                           | 21.2              |
| Unknown/Missing                      | 2 (2.2%)          | 13 (100.0%)              | 5 (11.1%)                      | 15 (9.3%)                 | 7 (17.1%)                      | 42 (11.9%)        |
| <b>APS</b>                           |                   |                          |                                |                           |                                |                   |
| Minimum                              | 39.2              | Inf                      | 35.2                           | 23                        | 23.8                           | 23                |
| Median (IQR)                         | 72.3 (61.5, 86.4) | NA (NA, NA)              | 66.6 (51.0, 78.6)              | 66.2 (53.6, 80.4)         | 63.3 (56.4, 77.3)              | 68.4 (56.0, 81.1) |
| Mean (SD)                            | 73.6 ± 17.7       | NA ± NA                  | 67.5 ± 19.1                    | 68.2 ± 21.3               | 66.0 ± 19.0                    | 69.3 ± 20.0       |
| Maximum                              | 108.6             | -Inf                     | 109.8                          | 161                       | 105                            | 161               |
| Unknown/Missing                      | 2 (2.2%)          | 13 (100.0%)              | 0 (0.0%)                       | 0 (0.0%)                  | 0 (0.0%)                       | 15 (4.2%)         |
| <b>Discharge Status</b>              |                   |                          |                                |                           |                                |                   |
| Deceased                             | 26 (28.6%)        | 0 (NaN%)                 | 15 (33.3%)                     | 59 (36.4%)                | 14 (34.1%)                     | 114 (33.6%)       |
| Home                                 | 36 (39.6%)        | 0 (NaN%)                 | 20 (44.4%)                     | 36 (22.2%)                | 10 (24.4%)                     | 102 (30.1%)       |
| Inpatient Facility                   | 17 (18.7%)        | 0 (NaN%)                 | 7 (15.6%)                      | 48 (29.6%)                | 14 (34.1%)                     | 86 (25.4%)        |
| LTAC                                 | 12 (13.2%)        | 0 (NaN%)                 | 3 (6.7%)                       | 18 (11.1%)                | 3 (7.3%)                       | 36 (10.6%)        |
| Other                                | 0 (0.0%)          | 0 (NaN%)                 | 0 (0.0%)                       | 1 (0.6%)                  | 0 (0.0%)                       | 1 (0.3%)          |
| Unknown/Missing                      | 2 (2.2%)          | 13 (100.0%)              | 0 (0.0%)                       | 0 (0.0%)                  | 0 (0.0%)                       | 15 (4.2%)         |
| <b>Duration of Intubation (days)</b> |                   |                          |                                |                           |                                |                   |
| Minimum                              | 0                 | 0                        | 0                              | 0                         | 1                              | 0                 |
| Median (IQR)                         | 20.0 (10.0, 32.0) | 0.0 (0.0, 0.0)           | 4.0 (2.0, 9.0)                 | 8.0 (3.0, 17.0)           | 9.0 (3.0, 14.0)                | 9.0 (3.0, 19.0)   |
| Mean (SD)                            | 23.9 ± 21.6       | 0.0 ± 0.0                | 8.4 ± 11.6                     | 11.7 ± 11.6               | 10.4 ± 8.9                     | 13.9 ± 15.8       |
| Maximum                              | 153               | 0                        | 58                             | 68                        | 34                             | 153               |
| <b>Length of ICU Stay (days)</b>     |                   |                          |                                |                           |                                |                   |
| Minimum                              | 3                 | 0                        | 1                              | 1                         | 2                              | 0                 |
| Median (IQR)                         | 22.0 (13.5, 35.0) | 0.0 (0.0, 0.0)           | 7.0 (4.0, 12.0)                | 10.0 (5.0, 19.0)          | 11.0 (7.0, 20.0)               | 12.0 (5.0, 22.0)  |
| Mean (SD)                            | 26.6 ± 21.2       | 0.0 ± 0.0                | 11.3 ± 13.9                    | 14.7 ± 14.2               | 13.4 ± 8.9                     | 16.6 ± 16.8       |
| Maximum                              | 153               | 0                        | 80                             | 86                        | 34                             | 153               |
| Unknown/Missing                      | 2 (2.2%)          | 0 (0.0%)                 | 0 (0.0%)                       | 0 (0.0%)                  | 0 (0.0%)                       | 2 (0.6%)          |
| <b>BMI (kg/m<sup>2</sup>)</b>        |                   |                          |                                |                           |                                |                   |
| Minimum                              | 19.22             | 18.4                     | 16.56                          | 12.46                     | 17.34                          | 12.46             |
| Median (IQR)                         | 31.8 (27.9, 38.9) | 24.1 (22.3, 26.0)        | 27.2 (24.5, 33.5)              | 26.6 (21.9, 31.6)         | 26.8 (23.2, 31.3)              | 28.1 (23.9, 33.8) |
| Mean (SD)                            | 34.1 ± 9.1        | 24.8 ± 4.2               | 30.7 ± 9.9                     | 27.5 ± 8.3                | 29.0 ± 9.3                     | 29.7 ± 9.1        |
| Maximum                              | 81.81             | 35.1                     | 70.6                           | 70.25                     | 64.18                          | 81.81             |
| Unknown/Missing                      | 3 (3.2%)          | 0 (0.0%)                 | 1 (2.2%)                       | 1 (0.6%)                  | 0 (0.0%)                       | 5 (1.4%)          |
| <b>Smoking Status</b>                |                   |                          |                                |                           |                                |                   |
| Current Smoker                       | 0 (0.0%)          | 0 (0.0%)                 | 6 (13.3%)                      | 21 (13.0%)                | 5 (12.2%)                      | 32 (9.0%)         |
| Never Smoker                         | 36 (38.7%)        | 13 (100.0%)              | 25 (55.6%)                     | 65 (40.1%)                | 20 (48.8%)                     | 159 (44.9%)       |
| Past Smoker                          | 13 (14.0%)        | 0 (0.0%)                 | 10 (22.2%)                     | 59 (36.4%)                | 15 (36.6%)                     | 97 (27.4%)        |
| Unknown or Not Reported              | 44 (47.3%)        | 0 (0.0%)                 | 4 (8.9%)                       | 17 (10.5%)                | 1 (2.4%)                       | 66 (18.6%)        |
| <b>Immunocompromised</b>             |                   |                          |                                |                           |                                |                   |
| Immunocompromised                    | 9 (9.9%)          | 0 (0.0%)                 | 10 (22.2%)                     | 49 (30.2%)                | 18 (43.9%)                     | 86 (24.4%)        |
| Not Immunocompromised                | 82 (90.1%)        | 13 (100.0%)              | 35 (77.8%)                     | 113 (69.8%)               | 23 (56.1%)                     | 266 (75.6%)       |
| Unknown/Missing                      | 2 (2.2%)          | 0 (0.0%)                 | 0 (0.0%)                       | 0 (0.0%)                  | 0 (0.0%)                       | 2 (0.6%)          |
| <b>AIDS/HIV</b>                      |                   |                          |                                |                           |                                |                   |
| Diagnosed                            | 1 (1.1%)          | 0 (0.0%)                 | 0 (0.0%)                       | 2 (1.2%)                  | 3 (7.3%)                       | 6 (1.7%)          |
| Not Diagnosed                        | 90 (98.9%)        | 13 (100.0%)              | 45 (100.0%)                    | 160 (98.8%)               | 38 (92.7%)                     | 346 (98.3%)       |
| Unknown/Missing                      | 2 (2.2%)          | 0 (0.0%)                 | 0 (0.0%)                       | 0 (0.0%)                  | 0 (0.0%)                       | 2 (0.6%)          |
| <b>Cancer</b>                        |                   |                          |                                |                           |                                |                   |
| Diagnosed                            | 14 (15.4%)        | 0 (0.0%)                 | 15 (33.3%)                     | 58 (35.8%)                | 21 (51.2%)                     | 108 (30.7%)       |

bioRxiv preprint doi: <https://doi.org/10.1101/2023.07.28.550765>; this version posted July 28, 2023. The copyright holder for this preprint (which was not certified by peer review) is the author/funder, who has granted bioRxiv a license to display the preprint in perpetuity. It is made available under aCC-BY-NC-ND 4.0 International license.

**Table S2.** Demographics of the SCRIPT cytokines cohort.



|                                    | COVID-19 (N = 93)        | Healthy Control (N = 13) | Non-Pneumonia Control (N = 45) | Other Pneumonia (N = 162) | Other Viral Pneumonia (N = 41) | Total (N = 354)          |
|------------------------------------|--------------------------|--------------------------|--------------------------------|---------------------------|--------------------------------|--------------------------|
| Not Diagnosed                      | 77 (84.6%)               | 13 (100.0%)              | 30 (66.7%)                     | 104 (64.2%)               | 20 (48.8%)                     | 244 (69.3%)              |
| Unknown/Missing                    | 2 (2.2%)                 | 0 (0.0%)                 | 0 (0.0%)                       | 0 (0.0%)                  | 0 (0.0%)                       | 2 (0.6%)                 |
| <b>Cerebrovascular Disease</b>     |                          |                          |                                |                           |                                |                          |
| Diagnosed                          | 9 (9.9%)                 | 0 (0.0%)                 | 9 (20.0%)                      | 39 (24.1%)                | 10 (24.4%)                     | 67 (19.0%)               |
| Not Diagnosed                      | 82 (90.1%)               | 13 (100.0%)              | 36 (80.0%)                     | 123 (75.9%)               | 31 (75.6%)                     | 285 (81.0%)              |
| Unknown/Missing                    | 2 (2.2%)                 | 0 (0.0%)                 | 0 (0.0%)                       | 0 (0.0%)                  | 0 (0.0%)                       | 2 (0.6%)                 |
| <b>Chronic Pulmonary Disease</b>   |                          |                          |                                |                           |                                |                          |
| Diagnosed                          | 21 (23.1%)               | 0 (0.0%)                 | 16 (35.6%)                     | 68 (42.0%)                | 17 (41.5%)                     | 122 (34.7%)              |
| Not Diagnosed                      | 70 (76.9%)               | 13 (100.0%)              | 29 (64.4%)                     | 94 (58.0%)                | 24 (58.5%)                     | 230 (65.3%)              |
| Unknown/Missing                    | 2 (2.2%)                 | 0 (0.0%)                 | 0 (0.0%)                       | 0 (0.0%)                  | 0 (0.0%)                       | 2 (0.6%)                 |
| <b>Congestive Heart Failure</b>    |                          |                          |                                |                           |                                |                          |
| Diagnosed                          | 14 (15.4%)               | 0 (0.0%)                 | 19 (42.2%)                     | 58 (35.8%)                | 7 (17.1%)                      | 98 (27.8%)               |
| Not Diagnosed                      | 77 (84.6%)               | 13 (100.0%)              | 26 (57.8%)                     | 104 (64.2%)               | 34 (82.9%)                     | 254 (72.2%)              |
| Unknown/Missing                    | 2 (2.2%)                 | 0 (0.0%)                 | 0 (0.0%)                       | 0 (0.0%)                  | 0 (0.0%)                       | 2 (0.6%)                 |
| <b>Dementia</b>                    |                          |                          |                                |                           |                                |                          |
| Diagnosed                          | 3 (3.3%)                 | 0 (0.0%)                 | 4 (8.9%)                       | 4 (2.5%)                  | 3 (7.3%)                       | 14 (4.0%)                |
| Not Diagnosed                      | 88 (96.7%)               | 13 (100.0%)              | 41 (91.1%)                     | 158 (97.5%)               | 38 (92.7%)                     | 338 (96.0%)              |
| Unknown/Missing                    | 2 (2.2%)                 | 0 (0.0%)                 | 0 (0.0%)                       | 0 (0.0%)                  | 0 (0.0%)                       | 2 (0.6%)                 |
| <b>Diabetes</b>                    |                          |                          |                                |                           |                                |                          |
| Diagnosed                          | 41 (45.1%)               | 0 (0.0%)                 | 14 (31.1%)                     | 44 (27.2%)                | 21 (51.2%)                     | 120 (34.1%)              |
| Not Diagnosed                      | 50 (54.9%)               | 13 (100.0%)              | 31 (68.9%)                     | 118 (72.8%)               | 20 (48.8%)                     | 232 (65.9%)              |
| Unknown/Missing                    | 2 (2.2%)                 | 0 (0.0%)                 | 0 (0.0%)                       | 0 (0.0%)                  | 0 (0.0%)                       | 2 (0.6%)                 |
| <b>Myocardial Infarction</b>       |                          |                          |                                |                           |                                |                          |
| Diagnosed                          | 2 (2.2%)                 | 0 (0.0%)                 | 5 (11.1%)                      | 17 (10.5%)                | 3 (7.3%)                       | 27 (7.7%)                |
| Not Diagnosed                      | 89 (97.8%)               | 13 (100.0%)              | 40 (88.9%)                     | 145 (89.5%)               | 38 (92.7%)                     | 325 (92.3%)              |
| Unknown/Missing                    | 2 (2.2%)                 | 0 (0.0%)                 | 0 (0.0%)                       | 0 (0.0%)                  | 0 (0.0%)                       | 2 (0.6%)                 |
| <b>Peripheral Vascular Disease</b> |                          |                          |                                |                           |                                |                          |
| Diagnosed                          | 12 (13.2%)               | 0 (0.0%)                 | 10 (22.2%)                     | 44 (27.2%)                | 8 (19.5%)                      | 74 (21.0%)               |
| Not Diagnosed                      | 79 (86.8%)               | 13 (100.0%)              | 35 (77.8%)                     | 118 (72.8%)               | 33 (80.5%)                     | 278 (79.0%)              |
| Unknown/Missing                    | 2 (2.2%)                 | 0 (0.0%)                 | 0 (0.0%)                       | 0 (0.0%)                  | 0 (0.0%)                       | 2 (0.6%)                 |
| <b>Renal Disease</b>               |                          |                          |                                |                           |                                |                          |
| Diagnosed                          | 13 (14.3%)               | 0 (0.0%)                 | 20 (44.4%)                     | 50 (30.9%)                | 12 (29.3%)                     | 95 (27.0%)               |
| Not Diagnosed                      | 78 (85.7%)               | 13 (100.0%)              | 25 (55.6%)                     | 112 (69.1%)               | 29 (70.7%)                     | 257 (73.0%)              |
| Unknown/Missing                    | 2 (2.2%)                 | 0 (0.0%)                 | 0 (0.0%)                       | 0 (0.0%)                  | 0 (0.0%)                       | 2 (0.6%)                 |
| <b>Rheumatic Disease</b>           |                          |                          |                                |                           |                                |                          |
| Diagnosed                          | 4 (4.4%)                 | 0 (0.0%)                 | 5 (11.1%)                      | 15 (9.3%)                 | 4 (9.8%)                       | 28 (8.0%)                |
| Not Diagnosed                      | 87 (95.6%)               | 13 (100.0%)              | 40 (88.9%)                     | 147 (90.7%)               | 37 (90.2%)                     | 324 (92.0%)              |
| Unknown/Missing                    | 2 (2.2%)                 | 0 (0.0%)                 | 0 (0.0%)                       | 0 (0.0%)                  | 0 (0.0%)                       | 2 (0.6%)                 |
| <b>Charlson Comorbidity Index</b>  |                          |                          |                                |                           |                                |                          |
| Minimum                            | 1                        | Inf                      | 1                              | 1                         | 1                              | 1                        |
| Median (IQR)                       | 3 (1.0, 5.0)             | NA (NA, NA)              | 6 (4.0, 9.0)                   | 5 (3.0, 8.0)              | 5 (3.0, 8.0)                   | 5.0 (2.0, 8.0)           |
| Mean (SD)                          | 3.9 ± 3.7                | NaN ± NA                 | 6.3 ± 3.4                      | 5.7 ± 3.5                 | 6.1 ± 4.0                      | 5.4 ± 3.7                |
| Maximum                            | 18                       | -Inf                     | 14                             | 17                        | 21                             | 21                       |
| Unknown/Missing                    | 36 (38.7%)               | 13 (100.0%)              | 8 (17.8%)                      | 25 (15.4%)                | 4 (9.8%)                       | 86 (24.3%)               |
| <b>Steroids</b>                    |                          |                          |                                |                           |                                |                          |
| Treated                            | 54 (58.1%)               | 0 (0.0%)                 | 33 (73.3%)                     | 116 (71.6%)               | 34 (82.9%)                     | 237 (66.9%)              |
| Untreated                          | 39 (41.9%)               | 13 (100.0%)              | 12 (26.7%)                     | 46 (28.4%)                | 7 (17.1%)                      | 117 (33.1%)              |
| <b>CRP (mg/L)</b>                  |                          |                          |                                |                           |                                |                          |
| Minimum                            | 0                        | Inf                      | 0                              | 0                         | 16.8                           | 0                        |
| Median (IQR)                       | 17.1 (10.7, 28.8)        | NA (NA, NA)              | 2.8 (1.2, 8.2)                 | 8.6 (2.8, 15.3)           | 29.5 (23.1, 32.8)              | 15.3 (6.0, 27.1)         |
| Mean (SD)                          | 22.9 ± 25.7              | NaN ± NA                 | 8.8 ± 15.2                     | 10.3 ± 9.4                | 27.4 ± 9.8                     | 19.4 ± 23.0              |
| Maximum                            | 197.3                    | -Inf                     | 48.3                           | 32.2                      | 36                             | 197.3                    |
| Unknown/Missing                    | 4 (4.3%)                 | 13 (100.0%)              | 36 (80.0%)                     | 136 (84.0%)               | 38 (92.7%)                     | 227 (64.1%)              |
| <b>D-Dimer (ng/mL)</b>             |                          |                          |                                |                           |                                |                          |
| Minimum                            | 0                        | Inf                      | 187                            | 0                         | 181                            | 0                        |
| Median (IQR)                       | 1,069.0 (512.0, 3,573.0) | NA (NA, NA)              | 3,507.0 (2,734.2, 4,712.2)     | 2,237.0 (733.0, 6,360.0)  | 2,398.0 (876.0, 3,315.0)       | 1,905.0 (610.0, 4,622.0) |
| Mean (SD)                          | 2,777.3 ± 3,680.2        | NaN ± NA                 | 10,501.4 ± 18,742.0            | 5,482.0 ± 9,262.9         | 3,229.5 ± 3,327.0              | 4,328.7 ± 8,142.1        |
| Maximum                            | 18329                    | -Inf                     | 55024                          | 48657                     | 11692                          | 55024                    |
| Unknown/Missing                    | 4 (4.3%)                 | 13 (100.0%)              | 31 (68.9%)                     | 101 (62.3%)               | 24 (58.5%)                     | 173 (48.9%)              |
| <b>Ferritin (ng/mL)</b>            |                          |                          |                                |                           |                                |                          |
| Minimum                            | 66.5                     | Inf                      | 21.6                           | 33.3                      | 184.9                          | 21.6                     |
| Median (IQR)                       | 798.5 (380.6, 1,394.2)   | NA (NA, NA)              | 250.5 (92.4, 290.1)            | 376.7 (135.9, 1,257.8)    | 938.1 (599.2, 1,166.8)         | 677.9 (257.4, 1,361.5)   |
| Mean (SD)                          | 1,671.3 ± 3,383.9        | NaN ± NA                 | 298.8 ± 321.8                  | 1,367.2 ± 4,169.4         | 1,095.3 ± 904.7                | 1,498.1 ± 3,456.3        |
| Maximum                            | 25815                    | -Inf                     | 839.5                          | 23599.7                   | 2781.7                         | 25815                    |
| Unknown/Missing                    | 21 (22.6%)               | 13 (100.0%)              | 40 (88.9%)                     | 131 (80.9%)               | 35 (85.4%)                     | 240 (67.8%)              |
| <b>WBC Count, BAL (cells/μL)</b>   |                          |                          |                                |                           |                                |                          |
| Minimum                            | 31                       | Inf                      | 0                              | 3                         | 0                              | 0                        |

bioRxiv preprint doi: <https://doi.org/10.1101/2023.07.28.550765>; this version posted July 28, 2023. The copyright holder for this preprint (which was not certified by peer review) is the author/funder, who has granted bioRxiv a license to display the preprint in perpetuity. It is made available under aCC-BY-NC-ND 4.0 International license.

|                                                    | COVID-19 (N = 93)    | Healthy Control (N = 13) | Non-Pneumonia Control (N = 45) | Other Pneumonia (N = 162) | Other Viral Pneumonia (N = 41) | Total (N = 354)      |
|----------------------------------------------------|----------------------|--------------------------|--------------------------------|---------------------------|--------------------------------|----------------------|
| Median (IQR)                                       | 207.5 (127.2, 434.0) | NA (NA, NA)              | 146.5 (33.2, 251.0)            | 423.5 (193.8, 1,612.2)    | 781.5 (177.0, 2,147.0)         | 273.5 (143.8, 863.2) |
| Mean (SD)                                          | 848.3 ± 3,873.2      | NaN ± NA                 | 495.5 ± 1,403.1                | 2,434.8 ± 5,691.9         | 2,038.4 ± 4,215.8              | 1,661.5 ± 4,674.0    |
| Maximum                                            | 34300                | -Inf                     | 7800                           | 43375                     | 24500                          | 43375                |
| Unknown/Missing                                    | 11 (11.8%)           | 13 (100.0%)              | 3 (6.7%)                       | 30 (18.5%)                | 5 (12.2%)                      | 62 (17.5%)           |
| <b>Neutrophils, BAL (%)</b>                        |                      |                          |                                |                           |                                |                      |
| Minimum                                            | 2                    | Inf                      | 0                              | 0                         | 0                              | 0                    |
| Median (IQR)                                       | 41.5 (22.5, 69.0)    | NA (NA, NA)              | 26.0 (6.0, 56.8)               | 82.0 (63.8, 91.2)         | 84.0 (57.5, 90.0)              | 69.0 (32.0, 87.0)    |
| Mean (SD)                                          | 45.4 ± 27.2          | NaN ± NA                 | 34.4 ± 30.3                    | 72.9 ± 25.0               | 66.8 ± 32.8                    | 59.7 ± 31.2          |
| Maximum                                            | 95                   | -Inf                     | 97                             | 100                       | 96                             | 100                  |
| Unknown/Missing                                    | 11 (11.8%)           | 13 (100.0%)              | 3 (6.7%)                       | 14 (8.6%)                 | 3 (7.3%)                       | 44 (12.4%)           |
| <b>Lymphocytes, BAL (%)</b>                        |                      |                          |                                |                           |                                |                      |
| Minimum                                            | 1                    | Inf                      | 1                              | 1                         | 1                              | 1                    |
| Median (IQR)                                       | 14.0 (6.5, 29.5)     | NA (NA, NA)              | 5.0 (3.0, 8.8)                 | 3.0 (1.0, 6.0)            | 2.0 (1.0, 5.2)                 | 5.0 (2.0, 12.0)      |
| Mean (SD)                                          | 20.5 ± 18.7          | NaN ± NA                 | 8.8 ± 15.1                     | 5.7 ± 8.2                 | 5.8 ± 10.5                     | 10.7 ± 14.9          |
| Maximum                                            | 85                   | -Inf                     | 88                             | 51                        | 55                             | 88                   |
| Unknown/Missing                                    | 14 (15.1%)           | 13 (100.0%)              | 11 (24.4%)                     | 48 (29.6%)                | 9 (22.0%)                      | 95 (26.8%)           |
| <b>WBC Count, Blood (10e3 cells/µL)</b>            |                      |                          |                                |                           |                                |                      |
| Minimum                                            | 3.4                  | Inf                      | 4.8                            | 0.1                       | 5.2                            | 0.1                  |
| Median (IQR)                                       | 10.2 (7.2, 14.2)     | NA (NA, NA)              | 9.2 (6.9, 11.5)                | 11.9 (9.1, 15.8)          | 8.7 (7.7, 10.2)                | 10.4 (7.6, 14.5)     |
| Mean (SD)                                          | 12.5 ± 10.8          | NaN ± NA                 | 9.9 ± 4.8                      | 13.9 ± 8.7                | 9.2 ± 3.8                      | 12.6 ± 9.9           |
| Maximum                                            | 98.6                 | -Inf                     | 20.4                           | 43.6                      | 14.4                           | 98.6                 |
| Unknown/Missing                                    | 2.3                  | 13 (100.0%)              | 36 (80.0%)                     | 128 (79.0%)               | 37 (90.2%)                     | 218 (61.6%)          |
| <b>Absolute Lymphocytes, Blood (10e3 cells/µL)</b> |                      |                          |                                |                           |                                |                      |
| Minimum                                            | 2.3                  | Inf                      | 0.6                            | 0.1                       | 0                              | 0                    |
| Median (IQR)                                       | 8.1 (5.4, 10.7)      | NA (NA, NA)              | 11.2 (5.7, 17.9)               | 10.0 (5.8, 15.6)          | 7.4 (4.9, 13.0)                | 9.0 (5.4, 14.1)      |
| Mean (SD)                                          | 8.9 ± 4.6            | NaN ± NA                 | 12.3 ± 8.5                     | 11.7 ± 8.5                | 9.3 ± 7.3                      | 10.7 ± 7.5           |
| Maximum                                            | 25.4                 | -Inf                     | 32.3                           | 48.3                      | 27.1                           | 48.3                 |
| Unknown/Missing                                    | 9 (9.7%)             | 13 (100.0%)              | 11 (24.4%)                     | 25 (15.4%)                | 8 (19.5%)                      | 66 (18.6%)           |
| <b>Absolute Lymphocytes, Blood (10e3 cells/µL)</b> |                      |                          |                                |                           |                                |                      |
| Minimum                                            | 0                    | Inf                      | 0                              | 0                         | 0                              | 0                    |
| Median (IQR)                                       | 1.0 (0.6, 1.4)       | NA (NA, NA)              | 0.6 (0.4, 1.4)                 | 0.9 (0.5, 1.8)            | 0.8 (0.3, 1.6)                 | 0.9 (0.5, 1.6)       |
| Mean (SD)                                          | 2.3 ± 10.1           | NaN ± NA                 | 1.4 ± 2.1                      | 1.6 ± 2.3                 | 1.1 ± 0.9                      | 1.7 ± 5.7            |
| Maximum                                            | 93.7                 | -Inf                     | 11.2                           | 18.2                      | 3.8                            | 93.7                 |
| Unknown/Missing                                    | 9 (9.7%)             | 13 (100.0%)              | 11 (24.4%)                     | 24 (14.8%)                | 8 (19.5%)                      | 65 (18.4%)           |

bioRxiv preprint doi: <https://doi.org/10.1101/2023.07.28.550765>; this version posted July 28, 2023. The copyright holder for this preprint (which was not certified by peer review) is the author/funder, who has granted bioRxiv a license to display the preprint in perpetuity. It is made available under aCC-BY 4.0 International license.

| Laser | Filter | Dye         | Antigen | Clone    | Dilution     | Catalog Number           | RR ID       |
|-------|--------|-------------|---------|----------|--------------|--------------------------|-------------|
| 305   | 750/50 | BUV737      | CD56    | NCAM16.2 | 1:10         | BD 612766                | AB_2813880  |
| 405   | 450/50 | eFluor450   | HLA-DR  | L243     | 1:20         | Thermo-Fisher 48-9952-42 | AB_1603291  |
| 552   | 575/25 | PE          | CD14    | MΦP9     | 1:10         | BD 562691                | AB_2737725  |
| 552   | 575/25 | PE          | CD3     | SK7      | 1:20         | Thermo-Fisher 12-0036-42 | AB_10805512 |
| 552   | 575/25 | PE          | CD19    | J3-119   | 1:10         | Beckman Coulter IM1285U  | AB_10640419 |
| 488   | 530/30 | SYTOX Green |         |          | 1:500-1:1000 | Thermo-Fisher S7020      |             |
| 640   | 670/39 | APC         | CD15    | W6D3     | 1:10         | BioLegend 323008         | AB_756014   |
| 640   | 780/60 | APC-Cy7     | CD45    | HI30     | 1:10         | CST 77322                | AB_2799894  |

**Table S3.** List of reagents used for FACS sorting of human neuroimmune cells.
